# Supplementary material
Source: MDPI journal article supplement (https://www.mdpi.com/2076-3271/10/3/35)
Supplement: s1 [file s1]

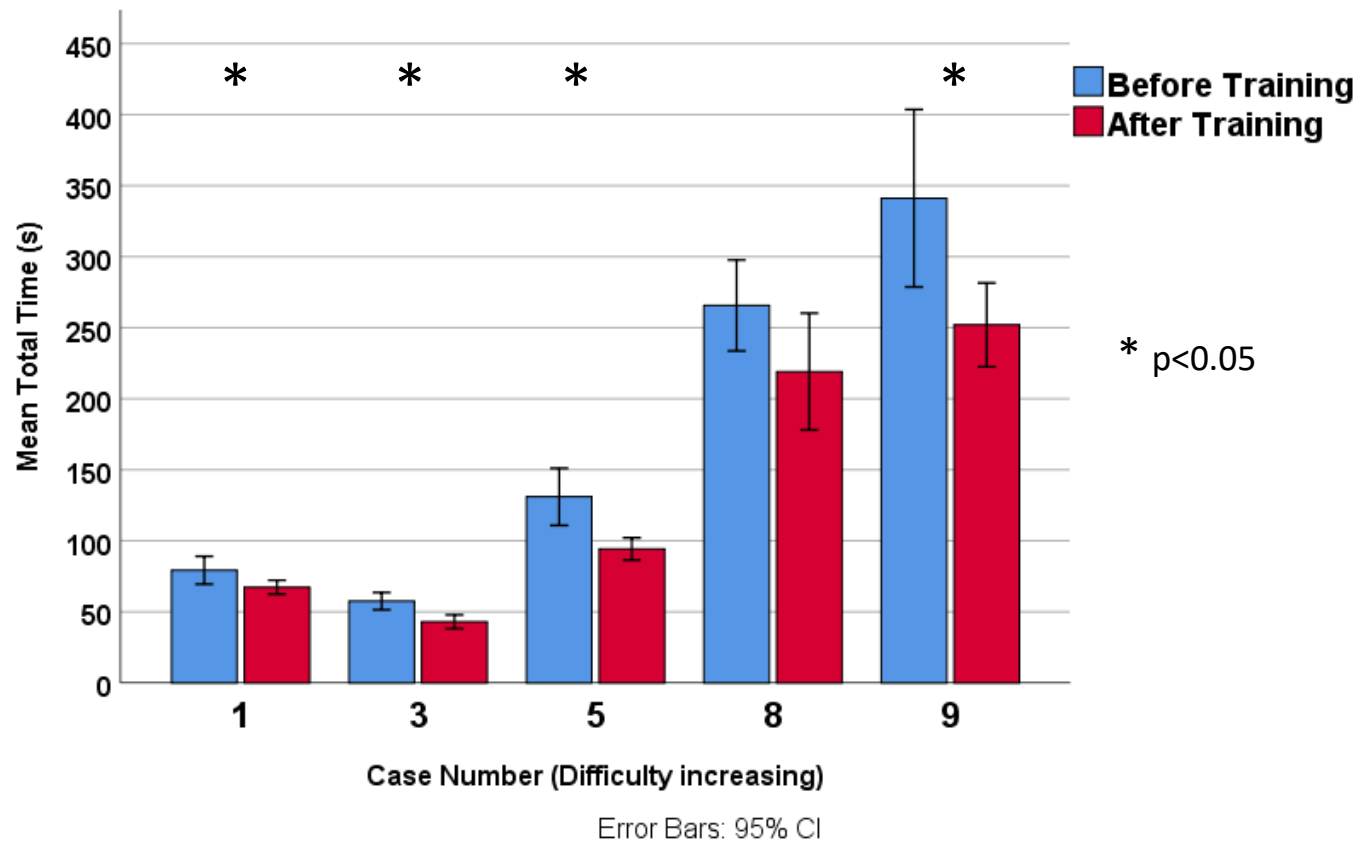

| Number | Case name (Lap Mentor III, Basic Skills Module) |
|--------|-------------------------------------------------|
| 1      | Camera Manipulation                             |
| 3      | Eye-Hand-Coordination                           |
| 5      | Clipping and Grasping                           |
| 8      | Electrocautery                                  |
| 9      | Translocation of objects                        |
